# Supplementary material
Source: PubMed Central journal article supplement (PMC2781418)
Supplement: supp_M109.016840_jbc.M109.016840-1.pdf [file supp_M109.016840_jbc.M109.016840-1.pdf]

**Forward and reverse primers for quantitative RT-PCR analysis:**

Mouse *Gata3* exon 1a forward: 5'-GAGCGTCAGCAACAGTGAAG-3'  
Mouse *Gata3* exon 1a reverse: 5'-CCACACTGCACACTGATTCC-3';  
mouse *Gata3* exon 1b forward: 5'-CAATCTGACCGGGCAGGT-3'  
mouse *Gata3* exon 1b reverse: 5'-CAGAGACGGTTGCTCTTCCG-3';  
mouse *Gata3 Exon 3/4* forward: 5'-CGGGTTCGGATGTAAGTCGA-3'  
mouse *Gata3 Exon 3/4* reverse: 5'-GTAGAGGTTGCCCCGAGT-3',  
mouse *Cdx2* RT-PCR forward: 5'-GCAGTCCCTAGGAAGCCAAGTGA-3',  
mouse *Cdx2* RT-PCR reverse: 5'-CTCTCGGAGAGCCCGAGTGTG-3'  
mouse *Tead4* RT-PCR forward: 5'-ATCCTGACGGAGGAAGGCA-3',  
mouse *Tead4* RT-PCR reverse: 5'-GCTTGATATGGCGTGCAT-3'  
mouse *Eomes* RT-PCR forward: 5'-ACCAATAACAAAGGTGCAAACAAC-3'  
mouse *Eomes* RT-PCR reverse: 5'-TGGTATTTGTGCAGAGACTGCAA-3'  
mouse *Oct-4* RT-PCR forward: 5'-CTCACCTGGGCGTTCTCT-3'  
mouse *Oct-4* RT-PCR reverse: 5'-AGGCCTCGAAGCGACAGA-3'  
mouse *Gapdh* RT-PCR forward: 5'-TGCCCCATGTTTGTGATG-3'  
mouse *Gapdh* RT-PCR reverse: 5'-TGTGGTCATGAGCCCTCC-3'.

**Forward and reverse primers for quantitative ChIP analysis:**

Mouse *Cdx2*(-996 bp GATA site forward: 5'-GCAGTGTCTGGCTGAGCTAT-3'  
Mouse *Cdx2*(-996 bp GATA site reverse: 5'-GGGAAGTATTTGTGCTGACACC-3'  
Mouse *Cdx2* (+)175 GATA site forward: 5'-AGGCAGAAGCTCTGCAAGG-3'  
Mouse *Cdx2* (+)175 GATA site reverse: 5'-CGCAGGGGGCTAGAGATAA-3'  
Mouse *Cdx2* (+)2562 GATA site forward: 5'-TCGCTTCCCAGGTCTGATAG-3'  
Mouse *Cdx2* (+)2562 GATA site reverse: 5'-GTGTGCAGACCGAATAGCAA-3'  
Mouse *Cdx2* (+)2882 GATA site forward: 5'-AACACCGGCTCAAACAATG-3'  
Mouse *Cdx2* (+)2882 GATA site reverse: 5'-TGCAGTTGTTATTAAGGCACTGA-3'  
Mouse *Cdx2* (+)3099 GATA site forward: 5'-TGTTCAACTAGGCACTGAGCA-3'  
Mouse *Cdx2* (+)3099 GATA site reverse: 5'-CGTCCAAAGTTGGAGAGGTC-3'  
Mouse *Cdx2* (+)3622 GATA site forward: 5'-TCGGCTAACTCTGATTGCAG-3'  
Mouse *Cdx2* (+)3622 GATA site reverse: 5'-ATATATCCACAGAAGCCAGAGG-3'  
Mouse *Cdx2* (+)5122 GATA site forward: 5'-GGCGCCATTTCTCTGTTCT-3'  
Mouse *Cdx2* (+)5122 GATA site reverse: 5'-TTCTGAAACCAAATTTTAAACCTAGAGA-3'  
Mouse *Cdx2* (+)5710 GATA site forward: 5'-CAGGACTGACTACCGACATGAA-3'  
Mouse *Cdx2* (+)5710 GATA site reverse: 5'-AAAGAGCTGGGGCAAAGAG-3'  
Mouse *Cdx2* (+)5908 GATA site forward: 5'-TCAAACACTACAGGAGCCAGAGG-3'  
Mouse *Cdx2* (+)5908 GATA site reverse: 5'-TCTGCAGACTTCGGTCAGTC-3'  
Mouse *Cdx2* (+)6333 GATA site forward: 5'-GGGATCCGAACACAGTTGAC-3'  
Mouse *Cdx2* (+)6333 GATA site reverse: 5'-AAGTTCGTTTATCTTTGTCTTTTACA-3'  
Mouse *Cdx2* (+)6370 GATA site forward: 5'-TCTTCTTTGGATTTTGAAGTAAAT-3'  
Mouse *Cdx2* (+)6370 GATA site reverse: 5'-AGCTTGCAACCAGAGAAGATG-3'  
Mouse *Cdx2* (+)6847 GATA site forward: 5'-TTCCCGACGACGCTTTTAT-3'  
Mouse *Cdx2* (+)6847 GATA site reverse: 5'-GGGCCATGGAAATACCTA-3'  
Mouse *Cdx2* (+)6923 GATA site forward: 5'-CGGAATAACATTATCTTCCCCTC-3'  
Mouse *Cdx2* (+)6923 GATA site reverse: 5'-TGAATTCTTGTGTTTGGTGG-3'  
Mouse *Cdx2* (+)6993 GATA site forward: 5'-GGTGGCTACTTATCTGCCTGA-3'  
Mouse *Cdx2* (+)6993 GATA site reverse: 5'-TAGCCAGAGGACCCAGACAC-3'  
Mouse *Gata2* (+)9.5kb region forward: 5'-AGATACCCAGAAGGTGC-3'  
Mouse *Gata2* (+)9.5kb region reverse: 5'-CATTATTTGCAGAGTGG-3'
